# Supplementary material for: Exploring the role of plasmapheresis prior to thyroidectomy in managing thyrotoxicosis: a comprehensive scoping review
Source: Springer Nature journal article supplement (doi:10.1007/s10047-024-01476-6), 2024-10-10

**Figure 1.** Flow-chart: Selection of eligible studies

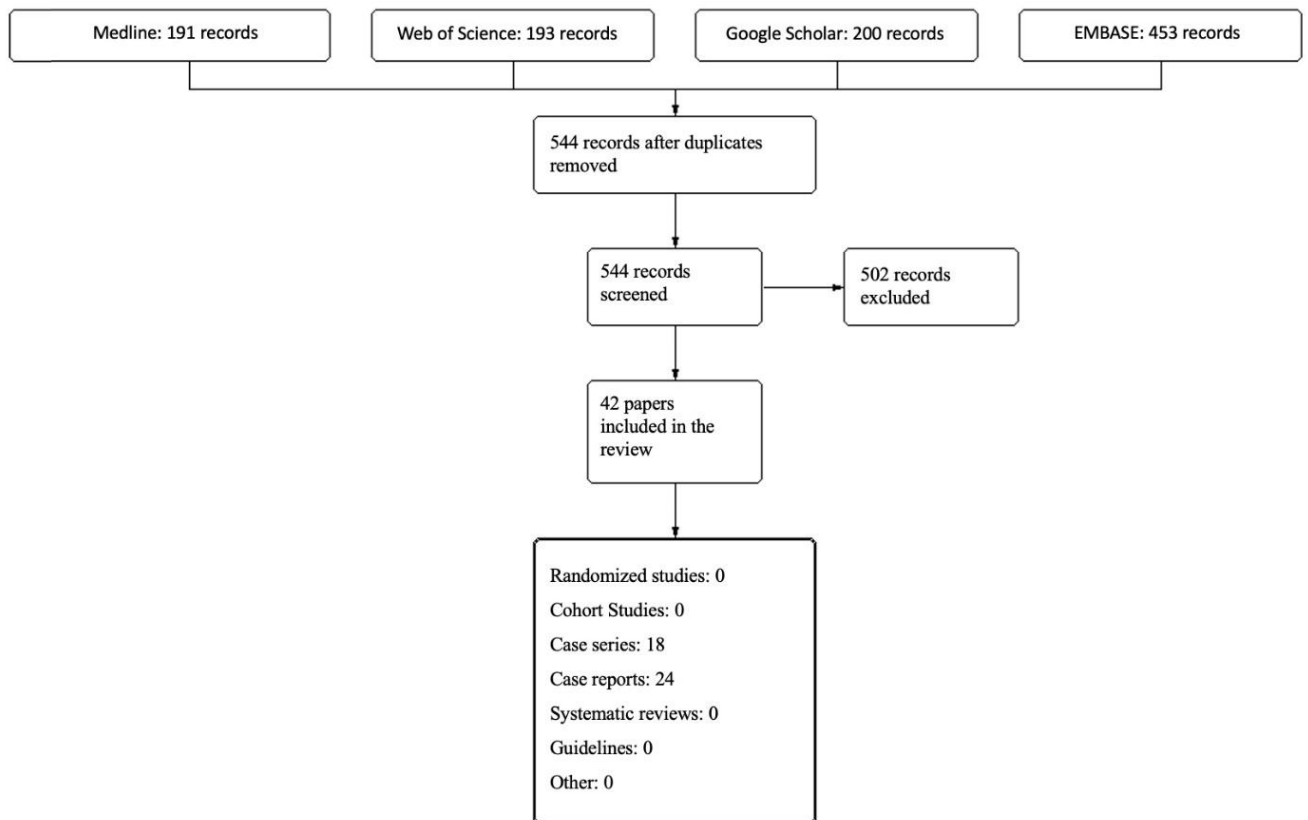

Supplement: MOESM1 [file 10047_2024_1476_MOESM1_ESM.pdf]
